# Supplementary material for: Paleo-Sedimentary Environments and Controlling Factors for Enrichment of Organic Matter in Alkaline Lake Sediments: A Case Study of the Lower Permian Fengcheng Formation in Well F7 at the Western Slope of Mahu Sag, Junggar Basin
Source: MDPI journal article supplement (doi:10.3390/pr11082483), 2023-08-18
Supplement: s1 [file s1]

Supplementary Table S1. Concentrations of REE and calculated parameters in samples from Fengcheng Formation in Mahu Sag

| For-<br><br>mation | lithogy             | Samples | Depth  | La    | Ce    | Pr    | Nd    | Sm    | Eu    | Gd    | Tb    | Dy    | Ho    | Er    | Tm    | Yb    | Lu    | Y     | ΣREY   | LREE   | HREE  | Y/Ho  | Ce <sup>+</sup> ano-maly | (La/Yb)N | (La/Sm)N | (Gd/Yb)N |  |  |  |  |  |  |  |  |  |  |
|--------------------|---------------------|---------|--------|-------|-------|-------|-------|-------|-------|-------|-------|-------|-------|-------|-------|-------|-------|-------|--------|--------|-------|-------|--------------------------|----------|----------|----------|--|--|--|--|--|--|--|--|--|--|
|                    |                     |         |        |       |       |       |       |       |       |       |       |       |       |       |       |       |       |       |        |        |       |       |                          |          |          |          |  |  |  |  |  |  |  |  |  |  |
|                    |                     |         |        | (ppm)  | (ppm)  | (ppm) | (ppm) | (ppm)                    | (ppm)    |          |          |  |  |  |  |  |  |  |  |  |  |
| P <sub>1f3</sub>   | Dolomite mudstone   | F7-4    | 3151.7 | 20.48 | 39.17 | 5.4   | 22.15 | 4.9   | 1.03  | 4.55  | 0.8   | 4.62  | 1.05  | 2.94  | 0.47  | 3.14  | 0.47  | 28.11 | 139.28 | 93.14  | 46.14 | 26.89 | 0.86                     | 0.48     | 0.61     | 0.88     |  |  |  |  |  |  |  |  |  |  |
|                    | Dolomite mudstone   | F7-5    | 3151.9 | 5.03  | 11.6  | 1.42  | 6.06  | 1.45  | 0.32  | 1.42  | 0.24  | 1.45  | 0.36  | 1.04  | 0.18  | 1.19  | 0.18  | 10.31 | 42.25  | 25.88  | 16.38 | 29.02 | 1                        | 0.31     | 0.5      | 0.72     |  |  |  |  |  |  |  |  |  |  |
|                    | Dolomite mudstone   | F7-6    | 3155.5 | 8.61  | 18.89 | 2.17  | 8.26  | 1.66  | 0.36  | 1.4   | 0.23  | 1.23  | 0.27  | 0.78  | 0.13  | 0.91  | 0.14  | 7.76  | 52.83  | 39.95  | 12.87 | 28.51 | 1.01                     | 0.7      | 0.75     | 0.93     |  |  |  |  |  |  |  |  |  |  |
|                    | Dolomite mudstone   | F7-7    | 3156.5 | 19.21 | 44.23 | 5.35  | 21.38 | 4.57  | 0.96  | 3.87  | 0.62  | 3.26  | 0.66  | 1.76  | 0.28  | 1.71  | 0.26  | 16.79 | 124.92 | 95.71  | 29.21 | 25.46 | 1.01                     | 0.83     | 0.61     | 1.37     |  |  |  |  |  |  |  |  |  |  |
|                    | Tuffaceous mudstone | F7-8    | 3158.8 | 18.49 | 40.68 | 4.56  | 17.57 | 3.6   | 0.7   | 3.12  | 0.53  | 2.94  | 0.66  | 1.86  | 0.32  | 1.98  | 0.3   | 17.62 | 114.93 | 85.6   | 29.33 | 26.5  | 1.02                     | 0.69     | 0.75     | 0.95     |  |  |  |  |  |  |  |  |  |  |
|                    | Tuffaceous mudstone | F7-9    | 3173.5 | 18.05 | 42.17 | 5.08  | 21.75 | 5.27  | 1.02  | 5.06  | 0.89  | 5.2   | 1.11  | 2.89  | 0.46  | 2.81  | 0.42  | 29.65 | 141.85 | 93.34  | 48.5  | 26.77 | 1.02                     | 0.47     | 0.5      | 1.09     |  |  |  |  |  |  |  |  |  |  |
|                    | Tuffaceous mudstone | F7-10   | 3176.2 | 19.02 | 39.57 | 5     | 20.99 | 4.76  | 1.09  | 4.42  | 0.76  | 4.29  | 0.94  | 2.7   | 0.42  | 2.59  | 0.4   | 24.58 | 131.54 | 90.43  | 41.11 | 26.05 | 0.94                     | 0.54     | 0.58     | 1.03     |  |  |  |  |  |  |  |  |  |  |
|                    | Tuffaceous mudstone | F7-11   | 3179.2 | 18.81 | 41.25 | 5.33  | 21.49 | 4.82  | 0.88  | 4.66  | 0.77  | 4.34  | 0.93  | 2.44  | 0.39  | 2.38  | 0.35  | 24.49 | 133.32 | 92.57  | 40.76 | 26.32 | 0.95                     | 0.58     | 0.57     | 1.19     |  |  |  |  |  |  |  |  |  |  |
|                    | Tuffaceous mudstone | F7-12   | 3180.9 | 20.73 | 44.97 | 5.69  | 23.41 | 5.28  | 1.13  | 4.79  | 0.81  | 4.49  | 0.99  | 2.68  | 0.43  | 2.61  | 0.39  | 26.68 | 145.1  | 101.22 | 43.88 | 26.83 | 0.96                     | 0.59     | 0.57     | 1.11     |  |  |  |  |  |  |  |  |  |  |
|                    | Dolimitic siltstone | F7-13   | 3182.9 | 23.98 | 52.34 | 6.35  | 26.31 | 5.82  | 1.1   | 5.57  | 0.96  | 5.59  | 1.24  | 3.33  | 0.53  | 3.09  | 0.45  | 31.37 | 168.02 | 115.89 | 52.13 | 25.3  | 0.98                     | 0.57     | 0.6      | 1.09     |  |  |  |  |  |  |  |  |  |  |
|                    | Dolimitic siltstone | F7-14   | 3186.8 | 7.53  | 16.9  | 1.85  | 7.18  | 1.48  | 0.3   | 1.27  | 0.21  | 1.24  | 0.28  | 0.84  | 0.15  | 1.01  | 0.15  | 8.33  | 48.72  | 35.25  | 13.47 | 30.25 | 1.04                     | 0.55     | 0.74     | 0.76     |  |  |  |  |  |  |  |  |  |  |
|                    | Dolimitic siltstone | F7-16   | 3198.3 | 15.78 | 31.86 | 3.7   | 15.62 | 3.88  | 0.84  | 3.74  | 0.61  | 3.42  | 0.72  | 1.89  | 0.31  | 1.81  | 0.27  | 18.76 | 103.23 | 71.69  | 31.55 | 25.89 | 0.96                     | 0.64     | 0.59     | 1.25     |  |  |  |  |  |  |  |  |  |  |

|                  |                     |       |        |       |       |      |       |      |      |      |      |      |      |      |      |      |      |       |        |        |       |       |      |      |      |      |
|------------------|---------------------|-------|--------|-------|-------|------|-------|------|------|------|------|------|------|------|------|------|------|-------|--------|--------|-------|-------|------|------|------|------|
|                  | Dolimitic siltstone | F7-17 | 3209.1 | 11.17 | 24.29 | 2.88 | 11.62 | 2.59 | 0.53 | 2.37 | 0.41 | 2.35 | 0.52 | 1.4  | 0.22 | 1.39 | 0.21 | 14.52 | 76.45  | 53.07  | 23.39 | 27.79 | 0.99 | 0.59 | 0.63 | 1.03 |
|                  | Dolomite mudstone   | F7-18 | 3210.1 | 26.42 | 48.67 | 7.37 | 32.94 | 8.25 | 1.26 | 8.14 | 1.43 | 8.35 | 1.92 | 5.01 | 0.79 | 4.44 | 0.62 | 51.74 | 207.34 | 124.9  | 82.44 | 26.94 | 0.8  | 0.44 | 0.47 | 1.11 |
|                  | Dolomite mudstone   | F7-19 | 3218.6 | 31.3  | 59.79 | 7.69 | 30.41 | 5.11 | 1    | 3.91 | 0.63 | 3.5  | 0.85 | 2.53 | 0.48 | 3.24 | 0.52 | 22.53 | 173.5  | 135.31 | 38.2  | 26.45 | 0.89 | 0.71 | 0.89 | 0.73 |
|                  | Dolomite mudstone   | F7-20 | 3220.5 | 16.5  | 37.54 | 4.83 | 20.94 | 5.18 | 1.01 | 5.03 | 0.87 | 4.95 | 1.11 | 2.97 | 0.48 | 2.96 | 0.43 | 29.92 | 134.73 | 86.01  | 48.72 | 27    | 0.97 | 0.41 | 0.46 | 1.03 |
|                  | Dolimitic siltstone | F7-21 | 3222.3 | 6.55  | 15.58 | 1.96 | 7.86  | 1.66 | 0.38 | 1.59 | 0.28 | 1.59 | 0.35 | 0.94 | 0.15 | 0.97 | 0.14 | 9.98  | 49.99  | 34     | 15.99 | 28.44 | 1    | 0.5  | 0.57 | 0.99 |
|                  | Dolimitic siltstone | F7-22 | 3225.8 | 7.29  | 16.89 | 2.22 | 9.38  | 2.07 | 0.45 | 1.83 | 0.3  | 1.68 | 0.39 | 1.12 | 0.19 | 1.3  | 0.19 | 10.96 | 56.29  | 38.31  | 17.97 | 27.93 | 0.97 | 0.41 | 0.51 | 0.85 |
|                  | Dolimitic siltstone | F7-24 | 3231.3 | 8.08  | 18.18 | 2.31 | 9.89  | 2.71 | 0.75 | 2.57 | 0.44 | 2.46 | 0.53 | 1.46 | 0.25 | 1.6  | 0.24 | 13.73 | 65.19  | 41.91  | 23.28 | 25.76 | 0.97 | 0.37 | 0.43 | 0.97 |
|                  | Dolimitic siltstone | F7-25 | 3233.1 | 7.66  | 16.19 | 2.03 | 8.13  | 2.02 | 0.51 | 1.97 | 0.35 | 1.93 | 0.43 | 1.12 | 0.18 | 1.09 | 0.16 | 10.46 | 54.23  | 36.54  | 17.69 | 24.58 | 0.95 | 0.52 | 0.55 | 1.09 |
|                  | Dolimitic siltstone | F7-26 | 3234.2 | 15.09 | 33.31 | 4.26 | 17.95 | 4.65 | 1.08 | 4.31 | 0.75 | 4.16 | 0.94 | 2.52 | 0.4  | 2.42 | 0.35 | 23.28 | 115.46 | 76.34  | 39.12 | 24.66 | 0.96 | 0.46 | 0.47 | 1.08 |
|                  | Dolimitic siltstone | F7-27 | 3236.7 | 7.52  | 16.46 | 2.11 | 9.27  | 2.69 | 0.65 | 2.47 | 0.41 | 2.32 | 0.53 | 1.46 | 0.23 | 1.41 | 0.2  | 13.89 | 61.63  | 38.71  | 22.92 | 26.14 | 0.95 | 0.39 | 0.41 | 1.06 |
|                  | Dolimitic siltstone | F7-28 | 3238.4 | 8.59  | 17.34 | 2.07 | 8.04  | 1.95 | 0.5  | 1.92 | 0.34 | 1.86 | 0.4  | 1.08 | 0.18 | 1.09 | 0.16 | 9.98  | 55.51  | 38.49  | 17.01 | 24.68 | 0.95 | 0.58 | 0.64 | 1.06 |
|                  | Dolomite mudstone   | F7-29 | 3243   | 23.87 | 46.75 | 5.51 | 23.67 | 5.52 | 0.84 | 2.61 | 0.36 | 1.6  | 0.35 | 0.98 | 0.16 | 1.13 | 0.17 | 9.08  | 122.59 | 106.15 | 16.43 | 26.28 | 0.94 | 1.56 | 0.63 | 1.39 |
|                  | Dolomite mudstone   | F7-30 | 3244.7 | 9.19  | 17.14 | 1.95 | 7.99  | 2.73 | 0.83 | 3.53 | 0.56 | 2.83 | 0.55 | 1.29 | 0.19 | 1.14 | 0.17 | 12.84 | 62.9   | 39.82  | 23.08 | 23.37 | 0.93 | 0.6  | 0.49 | 1.88 |
| P <sub>1f2</sub> | Dolomite mudstone   | F7-31 | 3248.5 | 15.28 | 33.03 | 4.05 | 16.65 | 4.04 | 0.91 | 3.44 | 0.58 | 3.27 | 0.82 | 2.67 | 0.52 | 3.54 | 0.51 | 23.43 | 112.75 | 73.97  | 38.78 | 28.69 | 0.97 | 0.32 | 0.55 | 0.59 |
|                  | Dolomite mudstone   | F7-32 | 3251   | 12.82 | 26    | 2.93 | 9.91  | 1.36 | 0.27 | 1.1  | 0.2  | 1.09 | 0.24 | 0.72 | 0.13 | 0.86 | 0.14 | 6.79  | 64.56  | 53.3   | 11.26 | 27.79 | 0.98 | 1.1  | 1.37 | 0.77 |

|                          |       |        |       |       |      |       |      |      |      |      |      |      |      |      |      |      |       |        |        |       |       |      |      |      |      |
|--------------------------|-------|--------|-------|-------|------|-------|------|------|------|------|------|------|------|------|------|------|-------|--------|--------|-------|-------|------|------|------|------|
| Dolimitic siltstone      | F7-33 | 3315   | 10.63 | 23.44 | 2.76 | 11.67 | 2.79 | 0.72 | 2.85 | 0.5  | 2.84 | 0.62 | 1.63 | 0.24 | 1.29 | 0.19 | 16.33 | 78.49  | 52     | 26.49 | 26.15 | 1    | 0.61 | 0.55 | 1.33 |
| Dolimitic siltstone      | F7-34 | 3365.3 | 4.03  | 8.94  | 1.05 | 4.11  | 1.16 | 0.3  | 1.31 | 0.25 | 1.53 | 0.35 | 1.02 | 0.16 | 0.99 | 0.14 | 8.34  | 33.7   | 19.6   | 14.1  | 23.57 | 1    | 0.3  | 0.5  | 0.81 |
| Dolimitic siltstone      | F7-35 | 3461.2 | 25.44 | 38.26 | 4.37 | 19.23 | 6.98 | 1.82 | 8.59 | 1.51 | 8.36 | 1.7  | 3.56 | 0.37 | 1.71 | 0.21 | 36.06 | 158.16 | 96.09  | 62.07 | 21.17 | 0.84 | 1.1  | 0.53 | 3.04 |
| Tuffaceous mudstone      | F7-36 | 3462   | 13.74 | 27.99 | 3.21 | 12.11 | 2.29 | 0.5  | 1.84 | 0.28 | 1.33 | 0.29 | 0.8  | 0.13 | 0.84 | 0.13 | 7.34  | 72.81  | 59.84  | 12.98 | 25.75 | 0.97 | 1.2  | 0.87 | 1.32 |
| Tuffaceous mudstone      | F7-37 | 3463.1 | 26.99 | 40.59 | 4.61 | 20.31 | 7.21 | 1.92 | 8.85 | 1.55 | 8.75 | 1.75 | 3.69 | 0.38 | 1.73 | 0.22 | 36.82 | 165.35 | 101.62 | 63.73 | 21.09 | 0.84 | 1.15 | 0.54 | 3.1  |
| Dolomite with flint band | F7-38 | 3464.6 | 9.66  | 19.99 | 2.2  | 8.29  | 1.67 | 0.4  | 1.54 | 0.25 | 1.37 | 0.3  | 0.82 | 0.14 | 0.91 | 0.14 | 7.45  | 55.13  | 42.21  | 12.92 | 25.13 | 1    | 0.79 | 0.84 | 1.03 |
| Dolomite with flint band | F7-39 | 3471.7 | 13.76 | 32.39 | 3.72 | 13.11 | 2.5  | 0.58 | 2.28 | 0.39 | 2.04 | 0.44 | 1.15 | 0.2  | 1.26 | 0.2  | 11.74 | 85.74  | 66.05  | 19.69 | 26.9  | 1.04 | 0.8  | 0.8  | 1.09 |
| Dolimitic siltstone      | F7-40 | 3477.8 | 9.95  | 22.22 | 2.71 | 10.72 | 2.15 | 0.44 | 1.82 | 0.31 | 1.77 | 0.41 | 1.21 | 0.23 | 1.71 | 0.28 | 10.99 | 66.9   | 48.19  | 18.72 | 26.87 | 0.99 | 0.43 | 0.67 | 0.64 |
| Dolomite with flint band | F7-41 | 3521.2 | 9.6   | 19.78 | 2.4  | 9.2   | 1.76 | 0.35 | 1.54 | 0.27 | 1.57 | 0.38 | 1.18 | 0.24 | 1.76 | 0.29 | 10.72 | 61.04  | 43.1   | 17.95 | 28.55 | 0.95 | 0.4  | 0.79 | 0.53 |
| Dolimitic siltstone      | F7-43 | 3550.2 | 11.49 | 23.82 | 2.97 | 13.1  | 4.03 | 1.09 | 4.85 | 0.85 | 4.93 | 1.07 | 2.64 | 0.34 | 1.75 | 0.23 | 23.84 | 97.01  | 56.51  | 40.5  | 22.22 | 0.94 | 0.48 | 0.41 | 1.68 |
| Dolimitic siltstone      | F7-44 | 3554.1 | 13.28 | 27.1  | 3.21 | 12.17 | 1.66 | 0.28 | 1.06 | 0.17 | 0.74 | 0.18 | 0.57 | 0.1  | 0.75 | 0.12 | 5.01  | 66.42  | 57.71  | 8.71  | 28.07 | 0.96 | 1.3  | 1.16 | 0.86 |
| Dolimitic siltstone      | F7-45 | 3569.4 | 6.97  | 15.92 | 1.93 | 7.57  | 1.56 | 0.37 | 1.34 | 0.23 | 1.24 | 0.27 | 0.84 | 0.15 | 0.98 | 0.15 | 8.12  | 47.65  | 34.32  | 13.32 | 29.59 | 1    | 0.52 | 0.65 | 0.82 |
| Dolimitic siltstone      | F7-46 | 3572.4 | 8.64  | 17.54 | 1.88 | 6.99  | 1.21 | 0.28 | 0.98 | 0.17 | 0.96 | 0.23 | 0.76 | 0.17 | 1.37 | 0.22 | 6.72  | 48.11  | 36.54  | 11.57 | 29.6  | 1    | 0.47 | 1.04 | 0.43 |
| Dolimitic siltstone      | F7-47 | 3636.7 | 6.41  | 13.08 | 1.5  | 5.8   | 1.66 | 0.52 | 2.88 | 0.64 | 5    | 1.4  | 5.14 | 1.07 | 6.33 | 0.79 | 38.32 | 90.54  | 28.96  | 61.58 | 27.29 | 0.97 | 0.07 | 0.56 | 0.28 |
| Dolimitic siltstone      | F7-48 | 3670.9 | 11.25 | 23.93 | 2.8  | 11.04 | 2.33 | 0.54 | 2.17 | 0.37 | 2.01 | 0.43 | 1.21 | 0.21 | 1.37 | 0.21 | 11.99 | 71.85  | 51.89  | 19.96 | 27.87 | 0.98 | 0.61 | 0.7  | 0.96 |

---

|                  |                     |       |        |      |       |      |      |      |      |      |      |      |      |      |      |      |      |      |       |       |       |       |      |      |      |      |
|------------------|---------------------|-------|--------|------|-------|------|------|------|------|------|------|------|------|------|------|------|------|------|-------|-------|-------|-------|------|------|------|------|
|                  | Dolimitic siltstone | F7-49 | 3673.6 | 8.02 | 17.8  | 2.15 | 8.29 | 1.47 | 0.28 | 1.1  | 0.17 | 0.93 | 0.22 | 0.68 | 0.12 | 0.77 | 0.12 | 6.22 | 48.33 | 38.01 | 10.33 | 28.05 | 0.99 | 0.77 | 0.79 | 0.87 |
|                  | Dolimitic siltstone | F7-50 | 3674.6 | 6.88 | 15.36 | 1.87 | 7.75 | 1.61 | 0.29 | 1.03 | 0.15 | 0.68 | 0.14 | 0.42 | 0.07 | 0.49 | 0.08 | 4.01 | 40.83 | 33.76 | 7.07  | 27.9  | 0.99 | 1.04 | 0.62 | 1.27 |
| P <sub>1f1</sub> | Dolimitic siltstone | F7-51 | 3677.1 | 9.07 | 19.2  | 2.26 | 9.1  | 1.89 | 0.38 | 1.5  | 0.23 | 1.21 | 0.25 | 0.76 | 0.15 | 1.14 | 0.2  | 7.15 | 54.49 | 41.9  | 12.59 | 28.48 | 0.98 | 0.59 | 0.7  | 0.8  |

LREE=La+Ce+Pr+Nd+Sm+Eu; HREE=Gd+Tb+Dy+Ho+Er+Tm+Yb+Lu+ Y; Ce/Ce \* = CeN/(LaN\*PrN)1/2, where REEN represent the value normalized by PAA

Supplementary Table S2. Concentrations of major elements and TOC in samples from Fengcheng Formation in Mahu Sag

| For-  | lithlogy          | Sam- | De-     | Na <sub>2</sub> O | MgO  | Al <sub>2</sub> O <sub>3</sub> | SiO <sub>2</sub> | P <sub>2</sub> O <sub>5</sub> | K <sub>2</sub> O | CaO  | TiO <sub>2</sub> | MnO   | Fe <sub>2</sub> O <sub>3</sub> | LOI   | TOC  |
|-------|-------------------|------|---------|-------------------|------|--------------------------------|------------------|-------------------------------|------------------|------|------------------|-------|--------------------------------|-------|------|
| matin |                   | ples | pth(m)  | (%)               | (%)  | (%)                            | (%)              | (%)                           | (%)              | (%)  | (%)              | (%)   | (%)                            | (%)   | (%)  |
|       | Pelitic siltstone | F7-1 | 3069.3  | 2.01              | 3.89 | 14.04                          | 58.76            | 0.19                          | 3.35             | 3.76 | 0.61             | 0.108 | 7.03                           | 5.28  | 0.02 |
|       | Dolomite mudstone | F7-2 | 3102.8  | 3.94              | 2.2  | 13.91                          | 70.07            | 0.09                          | 2.09             | 1.43 | 0.39             | 0.054 | 3.14                           | 2.84  | 0.02 |
|       | Dolomite mudstone | F7-3 | 3124.1  | 3.47              | 3.32 | 15.59                          | 61.99            | 0.11                          | 2.27             | 3.16 | 0.41             | 0.095 | 5.2                            | 4.44  | 0.01 |
|       | Dolomite mudstone | F7-4 | 3151.76 | 1.72              | 5.72 | 14.37                          | 57.18            | 0.15                          | 3.16             | 3.91 | 0.58             | 0.099 | 6.4                            | 6.58  | null |
|       | Dolomite mudstone | F7-5 | 3151.9  | 0.31              | 2.48 | 2.98                           | 79.15            | 0.06                          | 0.38             | 6.51 | 0.16             | 0.05  | 1.54                           | 8.18  | 2.03 |
|       | Dolomite mudstone | F7-6 | 3155.57 | 1.81              | 8.08 | 6.62                           | 55.32            | 0.03                          | 3.52             | 8.23 | 0.26             | 0.074 | 2.71                           | 14.18 | 0.84 |
|       | Dolomite mudstone | F7-7 | 3156.5  | 1.5               | 4.78 | 11.73                          | 60.34            | 0.1                           | 2.78             | 5.39 | 0.43             | 0.087 | 4.56                           | 9.07  | 0.56 |

|      |                     |       |         |      |      |       |       |      |      |       |      |       |      |       |      |
|------|---------------------|-------|---------|------|------|-------|-------|------|------|-------|------|-------|------|-------|------|
| P1f3 | Tuffaceous mudstone | F7-8  | 3158.8  | 1.01 | 6.1  | 9.41  | 53.94 | 0.09 | 2.27 | 10.43 | 0.43 | 0.136 | 4.32 | 12.64 | 0.06 |
|      | Tuffaceous mudstone | F7-9  | 3173.5  | 1.43 | 5.04 | 13.53 | 59.63 | 0.14 | 3.78 | 3.16  | 0.59 | 0.07  | 5.56 | 6.42  | 1.93 |
|      | Tuffaceous mudstone | F7-10 | 3176.2  | 3.61 | 3.89 | 14.13 | 59.34 | 0.17 | 3.27 | 3.4   | 0.57 | 0.117 | 6.01 | 5.56  | null |
|      | Tuffaceous mudstone | F7-11 | 3179.24 | 1.2  | 7.18 | 12.07 | 55.11 | 0.11 | 2.9  | 5.14  | 0.45 | 0.133 | 7.62 | 8.69  | 0.02 |
|      | Tuffaceous mudstone | F7-12 | 3180.9  | 1.62 | 4.18 | 13.55 | 56.74 | 0.15 | 3.72 | 5.54  | 0.52 | 0.095 | 5.39 | 7.86  | 0.04 |
|      | Dolimitic siltstone | F7-13 | 3182.9  | 1.77 | 4.98 | 13.05 | 54.58 | 0.12 | 3.06 | 7.7   | 0.49 | 0.114 | 4.61 | 9.01  | 0.02 |
|      | Dolimitic siltstone | F7-14 | 3186.84 | 0.5  | 5.21 | 3.74  | 68.19 | 0.02 | 1.23 | 8.06  | 0.13 | 0.094 | 1.69 | 12.03 | 0.52 |
|      | Dolimitic siltstone | F7-15 | 3189.29 | 1.07 | 7.1  | 6.79  | 59.1  | 0.06 | 1.94 | 7.94  | 0.29 | 0.077 | 3.25 | 13.28 | 0.85 |
|      | Dolimitic siltstone | F7-16 | 3198.35 | 1.53 | 2.81 | 9.59  | 58.83 | 0.07 | 3.48 | 7.31  | 0.34 | 0.062 | 3.49 | 12.55 | null |
|      | Dolimitic siltstone | F7-17 | 3209.1  | 1.24 | 5.4  | 9.79  | 60.2  | 0.07 | 3.25 | 6.28  | 0.35 | 0.088 | 3.96 | 10.71 | 1.37 |
|      | Dolomite mudstone   | F7-18 | 3210.17 | 1.82 | 4.08 | 12.59 | 52.6  | 0.13 | 3.51 | 8.71  | 0.42 | 0.123 | 5.75 | 9.98  | 0.07 |
|      | Dolomite mudstone   | F7-19 | 3218.6  | 6    | 3.06 | 13.6  | 57.29 | 0.09 | 2.35 | 3.89  | 0.54 | 0.078 | 5.17 | 6.93  | 0.02 |
| P1f3 | Dolomite mudstone   | F7-20 | 3220.55 | 4.49 | 4.02 | 12.78 | 58    | 0.1  | 4.44 | 3.24  | 0.61 | 0.133 | 5.09 | 7.6   | 1.29 |
|      | Dolimitic siltstone | F7-21 | 3222.3  | 1.75 | 4.71 | 4.96  | 67.56 | 0.03 | 1.93 | 6.32  | 0.21 | 0.067 | 2.45 | 11.1  | 0.9  |
|      | Dolimitic siltstone | F7-22 | 3225.8  | 1.94 | 3.13 | 6.69  | 67.42 | 0.03 | 3.02 | 3.78  | 0.25 | 0.055 | 3.07 | 10.8  | 3.43 |

|                          |       |         |      |      |       |       |      |      |      |      |       |      |       |      |
|--------------------------|-------|---------|------|------|-------|-------|------|------|------|------|-------|------|-------|------|
| Dolimitic siltstone      | F7-23 | 3228.3  | 5.21 | 1.39 | 13.44 | 64.27 | 0.05 | 4    | 2.04 | 0.22 | 0.054 | 3.56 | 6.92  | 0.44 |
| Dolimitic siltstone      | F7-24 | 3231.36 | 2.44 | 5.02 | 8.98  | 56.76 | 0.05 | 4.49 | 6.32 | 0.34 | 0.084 | 3.25 | 13.06 | 1.5  |
| Dolimitic siltstone      | F7-25 | 3233.1  | 2.59 | 5.79 | 10.92 | 59.23 | 0.06 | 5.96 | 3.29 | 0.44 | 0.071 | 3.81 | 8.82  | 0.27 |
| Dolimitic siltstone      | F7-26 | 3234.25 | 2.17 | 4.28 | 9.49  | 57.2  | 0.06 | 5.42 | 6.79 | 0.38 | 0.122 | 3.9  | 10.64 | null |
| Dolimitic siltstone      | F7-27 | 3236.7  | 2.61 | 1.24 | 11.87 | 68.62 | 0.07 | 6.58 | 1.67 | 0.53 | 0.056 | 3.08 | 4.41  | 0.46 |
| Dolimitic siltstone      | F7-28 | 3238.45 | 2.56 | 5.34 | 11.17 | 60.4  | 0.06 | 6.38 | 3.13 | 0.44 | 0.074 | 3.77 | 7.36  | 0.19 |
| Dolomite mudstone        | F7-29 | 3243    | 1.54 | 6.68 | 7.75  | 60.51 | 0.02 | 4.94 | 5.66 | 0.31 | 0.069 | 2.83 | 10.45 | 0.3  |
| Dolomite mudstone        | F7-30 | 3244.7  | 1.13 | 6.37 | 6.62  | 59.34 | 0.03 | 4.36 | 7.5  | 0.28 | 0.078 | 2.84 | 12.3  | 0.19 |
| Dolomite mudstone        | F7-31 | 3248.5  | 2.7  | 1.43 | 10.5  | 69.2  | 0.22 | 5.61 | 2.76 | 0.29 | 0.073 | 2.67 | 4.67  | null |
| Dolomite mudstone        | F7-32 | 3251.05 | 1.26 | 8.44 | 5.34  | 60.61 | 0.01 | 3.16 | 6.65 | 0.21 | 0.053 | 2.54 | 12.6  | 0.26 |
| Dolimitic siltstone      | F7-33 | 3315    | 3.34 | 5.39 | 11.22 | 53.31 | 0.06 | 5.44 | 6.35 | 0.25 | 0.106 | 3.95 | 9.76  | 0.03 |
| Dolimitic siltstone      | F7-34 | 3365.3  | 2.38 | 6.16 | 10.98 | 60.69 | 0.05 | 6.59 | 2.1  | 0.43 | 0.05  | 4.01 | 6.12  | 0.3  |
| Dolimitic siltstone      | F7-35 | 3461.2  | 1.76 | 6.13 | 7.88  | 58.61 | 0.04 | 4.73 | 6.62 | 0.24 | 0.097 | 3.19 | 11.67 | 0.05 |
| Tuffaceous mudstone      | F7-36 | 3462    | 2.72 | 8.2  | 10.14 | 53.6  | 0.04 | 5.18 | 5.47 | 0.3  | 0.087 | 3.64 | 10.34 | 0.56 |
| Dolomite with flint band | F7-38 | 3463.1  | 2.47 | 6    | 10.49 | 56.9  | 0.03 | 5.85 | 4.63 | 0.37 | 0.09  | 4.02 | 8.69  | 0.34 |

|                  |                          |       |         |      |       |      |       |      |      |       |      |       |      |       |      |
|------------------|--------------------------|-------|---------|------|-------|------|-------|------|------|-------|------|-------|------|-------|------|
| P <sub>1f2</sub> | Dolomite with flint band | F7-39 | 3464.61 | 1.87 | 7.23  | 8.75 | 49.78 | 0.03 | 5.24 | 7.93  | 0.4  | 0.152 | 4.26 | 15.04 | 1.73 |
|                  | Dolimitic siltstone      | F7-40 | 3471.7  | 2.28 | 10.06 | 7.67 | 48.2  | 0.01 | 3.68 | 9.17  | 0.31 | 0.096 | 3.45 | 15.8  | 0.53 |
|                  | Dolomite with flint band | F7-41 | 3477.8  | 2.62 | 11.74 | 8.13 | 41.67 | 0.01 | 3.85 | 10.86 | 0.29 | 0.096 | 3.43 | 17.81 | 0.76 |
|                  | Dolimitic siltstone      | F7-42 | 3521.2  | 1.92 | 10.09 | 5.9  | 49.65 | 0.01 | 2.72 | 10.36 | 0.3  | 0.082 | 3.31 | 15.7  | 0.63 |
|                  | Dolimitic siltstone      | F7-43 | 3529.5  | 0.72 | 3.87  | 6.05 | 64.17 | 0.03 | 4.53 | 8.25  | 0.21 | 0.07  | 2.44 | 10.54 | 0.61 |
|                  | Dolimitic siltstone      | F7-44 | 3550.2  | 1.53 | 9.06  | 8.89 | 54.21 | 0.02 | 6.8  | 5.24  | 0.37 | 0.065 | 3.1  | 10.37 | 0.27 |
|                  | Dolimitic siltstone      | F7-45 | 3554.1  | 1.1  | 11.2  | 6.78 | 42.48 | 0.04 | 5.13 | 13.07 | 0.18 | 0.097 | 2.24 | 17.83 | 0.26 |
|                  | Dolimitic siltstone      | F7-46 | 3569.4  | 2.31 | 7.91  | 7.58 | 56.88 | 0.02 | 3.62 | 6.86  | 0.25 | 0.096 | 3.03 | 12.04 | 0.61 |
|                  | Dolimitic siltstone      | F7-47 | 3572.45 | 0.94 | 3.89  | 2.82 | 75.73 | 0.01 | 1.25 | 5.68  | 0.12 | 0.054 | 1.68 | 9.07  | 0.2  |
| P <sub>1f1</sub> | Dolimitic siltstone      | F7-48 | 3636.7  | 1.1  | 5.63  | 8.76 | 50.78 | 0.05 | 6.64 | 9.57  | 0.33 | 0.1   | 3.69 | 13.11 | 0.27 |
|                  | Dolimitic siltstone      | F7-49 | 3670.9  | 1.98 | 13.17 | 4.89 | 52.01 | 0.01 | 3.6  | 8.02  | 0.2  | 0.057 | 2    | 15.32 | 0.63 |
|                  | Dolimitic siltstone      | F7-50 | 3673.6  | 4.55 | 11.06 | 3.85 | 55.85 | 0    | 2.65 | 5.37  | 0.18 | 0.048 | 1.81 | 13.58 | 0.73 |
|                  | Dolimitic siltstone      | F7-51 | 3674.6  | 2.1  | 3.23  | 5.88 | 70    | 0.06 | 2.18 | 4.59  | 0.22 | 0.05  | 3.05 | 8.94  | 0.15 |
|                  | Silicalite               | F7-52 | 3677.1  | 0.9  | 9.4   | 4.87 | 62.58 | 0.01 | 3.83 | 6.38  | 0.22 | 0.048 | 1.93 | 11.49 | 0.66 |

|            |       |      |      |       |      |       |      |      |      |      |       |      |      |      |
|------------|-------|------|------|-------|------|-------|------|------|------|------|-------|------|------|------|
| Silicalite | F7-53 | 3690 | 1.75 | 12.55 | 8.49 | 46.88 | 0.01 | 6.35 | 7.64 | 0.28 | 0.064 | 2.93 | 13.6 | 0.27 |
|------------|-------|------|------|-------|------|-------|------|------|------|------|-------|------|------|------|

Supplementary Table S3. Concentrations of trace elements in samples from Fengcheng Formation in Mahu Sag

| Formation | lithology           | Samples | Depth(m) | Sc    | V      | Cr     | Ni     | Cu    | Rb    | Sr     | Zr     | Mo    | Ba     | Th    |
|-----------|---------------------|---------|----------|-------|--------|--------|--------|-------|-------|--------|--------|-------|--------|-------|
|           |                     |         |          | (ppm) | (ppm)  | (ppm)  | (ppm)  | (ppm) | (ppm) | (ppm)  | (ppm)  | (ppm) | (ppm)  | (ppm) |
|           | Pelitic siltstone   | F7-1    | 3069.3   | 15.97 | 100.34 | 84.62  | 103.67 | 34.12 | 77.88 | 210.34 | 192.22 | 1.1   | 189.26 | 5.46  |
|           | Dolomite mudstone   | F7-2    | 3102.8   | 9.62  | 620.87 | 108.19 | 38.65  | 23.17 | 47.46 | 194.67 | 185.66 | 2.49  | 485.79 | 5.42  |
|           | Dolomite mudstone   | F7-3    | 3124.1   | 9.71  | 81.01  | 55.35  | 49.64  | 34.55 | 47.01 | 287.14 | 154.78 | 2.88  | 372.51 | 4.6   |
|           | Dolomite mudstone   | F7-4    | 3151.76  | 16.81 | 123.93 | 63.22  | 70.35  | 47.79 | 74.65 | 237.89 | 179.89 | 0.71  | 253.17 | 5.27  |
|           | Dolomite mudstone   | F7-5    | 3151.9   | 4.74  | 55.5   | 14.75  | 17.34  | 31.17 | 8.78  | 192.34 | 71.54  | 1.22  | 98.07  | 2.16  |
|           | Dolomite mudstone   | F7-6    | 3155.57  | 6.06  | 73.63  | 26.41  | 25.72  | 32.34 | 39.49 | 504.6  | 67.46  | 69.14 | 159.88 | 1.2   |
|           | Dolomite mudstone   | F7-7    | 3156.5   | 9.45  | 156.78 | 53.76  | 38.44  | 61.42 | 54.51 | 204.38 | 118.02 | 2.38  | 253.65 | 3.26  |
|           | Tuffaceous mudstone | F7-8    | 3158.8   | 12.95 | 141.51 | 46.73  | 39.78  | 33.06 | 48.07 | 241.82 | 119.03 | 0.68  | 221.17 | 3.98  |
|           | Tuffaceous mudstone | F7-9    | 3173.5   | 12.83 | 148.63 | 61.62  | 52.65  | 72.95 | 86.43 | 197.95 | 175.91 | 0.41  | 200.44 | 4.69  |
|           | Tuffaceous mudstone | F7-10   | 3176.2   | 11.68 | 109.63 | 79.07  | 59.46  | 59.55 | 67.17 | 205.58 | 148.45 | 0.34  | 222.66 | 4.41  |



|                 |                     |       |         |       |        |        |        |       |       |        |        |        |        |      |
|-----------------|---------------------|-------|---------|-------|--------|--------|--------|-------|-------|--------|--------|--------|--------|------|
| P <sub>1f</sub> | Tuffaceous mudstone | F7-11 | 3179.24 | 15.39 | 103.6  | 109.57 | 153.97 | 49.55 | 57.17 | 163.06 | 132.82 | 2.54   | 182.71 | 4.2  |
|                 | Tuffaceous mudstone | F7-12 | 3180.9  | 10.25 | 106.37 | 74.17  | 98.24  | 68.93 | 70.6  | 195.46 | 151.22 | 5.12   | 254.95 | 4.09 |
|                 | Dolimitic siltstone | F7-13 | 3182.9  | 9.86  | 103.94 | 69.07  | 53.44  | 41.27 | 63.76 | 302.25 | 171.64 | 1.62   | 256.53 | 4.25 |
|                 | Dolimitic siltstone | F7-14 | 3186.84 | 8.95  | 77.89  | 17.32  | 18.77  | 17.98 | 20.59 | 354.32 | 74.99  | 35.95  | 223.41 | 1.65 |
|                 | Dolimitic siltstone | F7-15 | 3189.29 | 7.17  | 131.19 | 35.59  | 39.03  | 47.25 | 34.59 | 328.78 | 91.27  | 100.24 | 183.65 | 1.69 |
|                 | Dolimitic siltstone | F7-16 | 3198.35 | 7.56  | 147.68 | 40.53  | 41.5   | 84.91 | 60.05 | 307.44 | 117.1  | 26.48  | 263.57 | 3.58 |
|                 | Dolimitic siltstone | F7-17 | 3209.1  | 7.49  | 132.32 | 47.44  | 31.11  | 47.65 | 50.05 | 211.5  | 98.54  | 54.82  | 192.21 | 2.88 |
|                 | Dolomite mudstone   | F7-18 | 3210.17 | 10.09 | 81.99  | 46.36  | 63.94  | 47.37 | 66.88 | 365.63 | 164.06 | 63.92  | 317.52 | 5.74 |
|                 | Dolomite mudstone   | F7-19 | 3218.6  | 14.59 | 109.48 | 90.75  | 51.49  | 43.16 | 38.19 | 449.89 | 142.81 | 0.77   | 296.03 | 6.42 |
|                 | Dolomite mudstone   | F7-20 | 3220.55 | 13.62 | 120.45 | 65.58  | 51.09  | 48.98 | 58.2  | 290.92 | 157.43 | 2.73   | 238.4  | 4.6  |
|                 | Dolimitic siltstone | F7-21 | 3222.3  | 6.97  | 76.17  | 25.47  | 25     | 28.14 | 23    | 509.15 | 70.76  | 17.28  | 167.51 | 1.22 |
|                 | Dolimitic siltstone | F7-22 | 3225.8  | 8.46  | 118.67 | 33.71  | 32.4   | 58.2  | 33.33 | 262.79 | 68.76  | 31.74  | 247.6  | 1.93 |
|                 | Dolimitic siltstone | F7-23 | 3228.3  | 6.72  | 48.35  | 27.47  | 32.56  | 32.55 | 31.67 | 260.68 | 68.18  | 11.96  | 299.54 | 2.33 |
|                 | Dolimitic siltstone | F7-24 | 3231.36 | 5.95  | 100.25 | 41.75  | 27.54  | 59.3  | 41.49 | 384.95 | 101.65 | 26.08  | 475.35 | 2.47 |
|                 | Dolimitic siltstone | F7-25 | 3233.1  | 6.4   | 88.62  | 57.37  | 27.83  | 28.82 | 64.19 | 357.62 | 96.85  | 15.3   | 318.06 | 1.31 |

|     |                          |       |         |      |        |       |       |       |       |        |        |       |        |      |
|-----|--------------------------|-------|---------|------|--------|-------|-------|-------|-------|--------|--------|-------|--------|------|
| Pif | Dolimitic siltstone      | F7-26 | 3234.25 | 8.21 | 90.31  | 61.97 | 28.14 | 24.83 | 39.74 | 470.97 | 104.48 | 20.17 | 189.24 | 2.17 |
|     | Dolimitic siltstone      | F7-27 | 3236.7  | 4.01 | 49.86  | 51.05 | 35.34 | 35.92 | 50.62 | 137.03 | 128.79 | 22.76 | 204.72 | 1.67 |
|     | Dolimitic siltstone      | F7-28 | 3238.45 | 5.87 | 88.86  | 56.43 | 29.07 | 30.18 | 64.34 | 346.58 | 100.26 | 17.33 | 265.52 | 1.24 |
|     | Dolomite mudstone        | F7-29 | 3243    | 4.93 | 75.57  | 34.37 | 20.16 | 32.85 | 57.72 | 451.49 | 96.56  | 26.34 | 179.29 | 3.6  |
|     | Dolomite mudstone        | F7-30 | 3244.7  | 6.65 | 74.86  | 36.85 | 27.79 | 33.02 | 37.25 | 450.87 | 74.87  | 41.73 | 180.8  | 0.99 |
|     | Dolomite mudstone        | F7-31 | 3248.5  | 4.4  | 50.19  | 29.36 | 20.27 | 22.25 | 33.27 | 314.14 | 56.09  | 5.81  | 90.55  | 6.14 |
|     | Dolomite mudstone        | F7-32 | 3251.05 | 5.11 | 72.7   | 26.31 | 21.77 | 29.95 | 46.02 | 451.09 | 51.39  | 48.12 | 141.14 | 0.89 |
|     | Dolimitic siltstone      | F7-33 | 3315    | 6.9  | 96.97  | 30.14 | 28.43 | 23.38 | 45.62 | 589.95 | 85.12  | 13.34 | 548.11 | 1.33 |
|     | Dolimitic siltstone      | F7-34 | 3365.3  | 4.42 | 94.76  | 54.14 | 31.08 | 37.4  | 79.75 | 145.35 | 110.44 | 18.49 | 232.14 | 1.03 |
|     | Dolimitic siltstone      | F7-35 | 3461.2  | 6.72 | 85.03  | 45.15 | 29.74 | 23.48 | 38.43 | 472.83 | 73.26  | 27.51 | 294.99 | 1.3  |
|     | Tuffaceous mudstone      | F7-36 | 3462    | 6.03 | 88.51  | 36.04 | 25.74 | 27.77 | 56.49 | 410.35 | 85.58  | 26.71 | 366.96 | 0.9  |
|     | Dolomite with flint band | F7-38 | 3463.1  | 7.92 | 107.81 | 43.96 | 33.1  | 34.45 | 66.04 | 359.04 | 102.01 | 21.7  | 270.07 | 0.92 |
|     | Dolomite with flint band | F7-39 | 3464.61 | 10.4 | 128.78 | 42.45 | 35.02 | 51.61 | 60.43 | 538.25 | 79.78  | 21.38 | 290.25 | 1.09 |
|     | Dolimitic siltstone      | F7-40 | 3471.7  | 9.64 | 87.8   | 36.3  | 29.57 | 30.54 | 63.7  | 544.09 | 57.51  | 32.64 | 200.08 | 0.92 |
|     | Dolomite with flint band | F7-41 | 3477.8  | 8.74 | 83.66  | 34.1  | 29.82 | 30.03 | 66.65 | 622.65 | 57.47  | 11.04 | 223.52 | 1.07 |

|                  |                     |       |         |      |       |       |       |       |       |         |        |       |        |      |
|------------------|---------------------|-------|---------|------|-------|-------|-------|-------|-------|---------|--------|-------|--------|------|
|                  | Dolimitic siltstone | F7-42 | 3521.2  | 5.62 | 78.65 | 30.53 | 28.32 | 29.42 | 47.26 | 696.37  | 52.84  | 37.63 | 216.17 | 0.71 |
|                  | Dolimitic siltstone | F7-43 | 3529.5  | 6.76 | 67.88 | 28.12 | 21.84 | 40.17 | 39.79 | 550.24  | 56.77  | 15.61 | 419.78 | 2.74 |
|                  | Dolimitic siltstone | F7-44 | 3550.2  | 6.95 | 98.48 | 39.85 | 27.44 | 26.62 | 73.51 | 395.86  | 299.49 | 18.56 | 94.39  | 1.13 |
|                  | Dolimitic siltstone | F7-45 | 3554.1  | 6.08 | 92.01 | 30.33 | 26.84 | 17.5  | 41.77 | 753.74  | 78.13  | 24.24 | 240.47 | 0.91 |
|                  | Dolimitic siltstone | F7-46 | 3569.4  | 7.48 | 87.94 | 34.85 | 28.55 | 26.5  | 59.68 | 441.88  | 69.99  | 18.47 | 304.93 | 0.89 |
|                  | Dolimitic siltstone | F7-47 | 3572.45 | 7.73 | 76.98 | 15.61 | 13.9  | 13.64 | 14.73 | 341.15  | 25.32  | 10.4  | 213.91 | 1.05 |
|                  | Dolimitic siltstone | F7-48 | 3636.7  | 8.41 | 98.37 | 42.74 | 37.52 | 40.54 | 59.78 | 583.82  | 76.06  | 28.26 | 241.27 | 1.98 |
| P <sub>1f1</sub> | Dolimitic siltstone | F7-49 | 3670.9  | 7.6  | 63.74 | 26.1  | 22.65 | 17.21 | 56.85 | 600.27  | 61.13  | 7.93  | 116.62 | 1.1  |
|                  | Dolimitic siltstone | F7-50 | 3673.6  | 9.1  | 58.14 | 21.6  | 20.89 | 14.62 | 52.5  | 423.62  | 57.79  | 5.22  | 335.93 | 0.78 |
|                  | Dolimitic siltstone | F7-51 | 3674.6  | 4.6  | 58.46 | 29.39 | 25.98 | 35.81 | 24.54 | 390.69  | 156.78 | 26.91 | 153.23 | 3.22 |
|                  | Silicalite          | F7-52 | 3677.1  | 4.9  | 68.82 | 28.29 | 22.12 | 16.03 | 59.84 | 427.63  | 112.18 | 11.09 | 135.07 | 0.54 |
|                  | Silicalite          | F7-53 | 3690    | 7.37 | 93.53 | 45.95 | 32.07 | 23.38 | 73.74 | 1011.32 | 219.86 | 22.22 | 230.54 | 3.39 |
